# Supplementary material for: Long-term patterns of body mass and stature evolution within the hominin lineage
Source: R Soc Open Sci. 2017 Nov 8;4(11):171339. doi: 10.1098/rsos.171339 (PMC5717693; doi:10.1098/rsos.171339)
Supplement: Supplementary file 3 [file rsos171339supp4.xlsx]

## Sheet: Test Mid-Plei Homo
Overview of regression comparisons for Mid-Pleistocene Homo (Summary of results in Supplementary Information; details in other sheets "Body mass/Stature Mid-Plei Homo")
	BM (in study)	BM (Will & Stock 2015)	diff (kg)	diff (%)	Element (in test)*	Stature (in study)	Stature (Will & Stock 2015)	diff (cm)	diff (%)	Element (in test)*
Broken Hill E689 (Femur)	75.766	74.837	-0.929	-1.22614	F16
Broken Hill E691 (Tibia)						184.2	170.035	-14.1652	-7.69011	T1
Broken Hill E907 (Femur)	82.57	81.155	-1.415	-1.7137	F16
ThI94-UA28-7	59.8	59.8	0	0	FemArea (MS)
AT-489						166.25	160.473	-5.77671	-3.47471	Ca1
AT-575	64.8	59.4049	-5.39508	-8.32575	Ta12	166.95	158.57	-8.38045	-5.01973	Ta6
AT-800 (coxal)	75.766	74.837			F16
AT-835+AT-2501 (coxal)	77.8072	76.7324			F16
AT-859	63.8	58.9521	-4.84792	-7.59862	Ta12
AT-860	62.5	58.0433	-4.45667	-7.13068	Ta12	161	155.836	-5.16412	-3.20753	Ta6
AT-1004 (coxal)	66.2404	65.9918	-0.2486	-0.3753	F16
AT-1480	72.4	63.4359	-8.96412	-12.3814	Ta12
AT-1700						170.9	165.938	-4.96183	-2.90335	Ta6
AT-1832	65.8	60.0823	-5.71773	-8.68956	Ta12
AT-1930	66.1	60.0823	-6.01773	-9.10398	Ta12	162.8	158.427	-4.37305	-2.68615	Ta6
AT-2350 (coxal)	75.766	74.837			F16
AT-2466						160	158.028	-1.97234	-1.23271	Ca1
AT-2803	80.3	67.3911	-12.9089	-16.0759	Ta12	174	166.885	-7.11493	-4.08904	Ta6
AT-3130						165.1	159.109	-5.99067	-3.62851	Ca1
AT-3131						165.05	159.011	-6.03864	-3.65867	Ca1
AT-3132	75.6	65.2027	-10.3973	-13.753	Ta12	164.3	160.552	-3.74839	-2.28143	Ta6
AT-3133	58.5	55.9832	-2.51676	-4.30215	Ta12	166.3	158.141	-8.15868	-4.906	Ta6
AT-4425	72.1	63.4359	-8.66412	-12.0168	Ta12	163.6	159.564	-4.03608	-2.46704	Ta6
SH Pelvis 110	78.7144	77.5748	-1.1396	-1.44777	F16
SH Coxal 1 (Coxal)	56.9416	55.6871	-1.25453	-2.20319	F16
SH Femur IV/V	68.962	67.0838	-1.87817	-2.72348	F16
SH Femur X	83.2504	81.7868	-1.4636	-1.75807	F16	170	166.941	-3.05917	-1.79951	F1
SH Femur XI	58.3024	56.9773	-1.32513	-2.27286	F16
SH Femur XII/XIII	73.8	73.1522	-0.6478	-0.877778	F16	167.8	165.04	-2.76041	-1.64506	F1
SH Femur XVI	56.9416	55.6871	-1.25453	-2.20319	F16
SH Tibia I						157.9	154.156	-3.74358	-2.37086	T1
SH Tibia III / AT-848 (Tibia)						171.7	165.562	-6.13824	-3.57498	T1
SH Tibia IV						154.3	151.078	-3.22197	-2.08812	T1
SH Tibia VI						164.5	159.654	-4.84641	-2.94614	T1
SH Tibia XI						162.8	158.291	-4.50904	-2.76968	T1
SH Tibia XII						168.4	162.894	-5.50649	-3.26989	T1
SH Fibula I						162.3	-			Fib1	No formulae
SH Fibula II						153.7	-			Fib1	No formulae
SH Fibula III						164.5	-			Fib1	No formulae
SH foot association 1	72.95	63.879	-9.07102	-12.4346	Ta12	173.675	165.4	-8.275	-4.76465	Ta6 / Ca 1
SH foot association 2	57.6	55.2917	-2.30831	-4.00749	Ta12	161.3	157.6	-3.7	-2.29386	Ta6 / Ca 1
SH foot association 3						175.55	167.554	-7.99645	-4.55508	Ca1
SH foot association 5	90.7	73.6702	-17.0298	-18.7759	Ta12	175.274	170.22	-5.05371	-2.88332	Ta6
SH foot association 7						177.8	170.377	-7.42314	-4.17499	Ca1
SH foot association 8	65.7	59.8567	-5.84326	-8.89386	Ta12	173.65	167.5	-6.15	-3.54161	Ca 1
SH foot association 9	62.55	58.2709	-4.2791	-6.84108	Ta12	159.8	155.4	-4.4	-2.75344	Ta6 / Ca 1
Arago 44	79.6216	78.4172	-1.2044	-1.51265	F16
Boxgrove	82.8	82.8	0	0	T1	175.5	164.231	-11.0688	-6.31423	T1
Sambungmacan 2	61.9	61.9	0	0	T16	165.1	165.1	0	0	T16
					*see "Measurement key"					*see "Measurement key"
Mean	70.2	66.3	-3.9	-5.6		166.8	161.9	-4.9	-2.9
Mean without Ta12	71.5	70.5	-1	-1.4		166.8	161.9	-4.9	-2.9
CV	13.1	13.3				4.2	3.1

## Sheet: BM Mid-Plei Homo
	Element*	Measurement (mm)	log10	Prediction FHD (Will & Stock)	Prediction BM (Will & Stock)	BM (in study)	diff (kg)	diff (%)
Broken Hill E689 (Femur)	F16	49.5		49.5	74.837	75.766	-0.929	-1.22614
Broken Hill E691 (Tibia)
Broken Hill E907 (Femur)	F16	52.5		52.5	81.155	82.57	-1.415	-1.7137
ThI94-UA28-7	FemArea (MS)				59.8	59.8	0	0
AT-489
AT-575	Ta12	28	1.44716	42.929	59.4049	64.8	-5.39508	-8.32575
AT-800 (coxal)	F16	49.5		49.5	74.837	75.766
AT-835+AT-2501 (coxal)	F16	50.4		50.4	76.7324	77.8072
AT-859	Ta12	27.8	1.44404	42.7184	58.9521	63.8	-4.84792	-7.59862
AT-860	Ta12	27.4	1.43775	42.2958	58.0433	62.5	-4.45667	-7.13068
AT-1004 (coxal)	F16	45.3		45.3	65.9918	66.2404	-0.2486	-0.3753
AT-1480	Ta12	29.8	1.47422	44.8035	63.4359	72.4	-8.96412	-12.3814
AT-1700
AT-1832	Ta12	28.3	1.45179	43.244	60.0823	65.8	-5.71773	-8.68956
AT-1930	Ta12	28.3	1.45179	43.244	60.0823	66.1	-6.01773	-9.10398
AT-2350 (coxal)	F16	49.5		49.5	74.837	75.766
AT-2466
AT-2803	Ta12	31.6	1.49969	46.6429	67.3911	80.3	-12.9089	-16.0759
AT-3130
AT-3131
AT-3132	Ta12	30.6	1.48572	45.6252	65.2027	75.6	-10.3973	-13.753
AT-3133	Ta12	26.5	1.42325	41.3377	55.9832	58.5	-2.51676	-4.30215
AT-4425	Ta12	29.8	1.47422	44.8035	63.4359	72.1	-8.66412	-12.0168
SH Pelvis 110	F16	50.8		50.8	77.5748	78.7144	-1.1396	-1.44777
SH Coxal 1 (Coxal)	F16	41.2		41.2	55.6871	56.9416	-1.25453	-2.20319
SH Femur IV/V	F16	46.5		46.5	67.0838	68.962	-1.87817	-2.72348
SH Femur X	F16	52.8		52.8	81.7868	83.2504	-1.4636	-1.75807
SH Femur XI	F16	41.8		41.8	56.9773	58.3024	-1.32513	-2.27286
SH Femur XII/XIII	F16	48.7		48.7	73.1522	73.8	-0.6478	-0.877778
SH Femur XVI	F16	41.2		41.2	55.6871	56.9416	-1.25453	-2.20319
SH Tibia I
SH Tibia III / AT-848 (Tibia)
SH Tibia IV
SH Tibia VI
SH Tibia XI
SH Tibia XII
SH Fibula I
SH Fibula II
SH Fibula III
SH foot association 13	Ta12	30	1.47712	45.0096	63.879	72.95	-9.07102	-12.4346
SH foot association 24	Ta12	26.2	1.4183	41.0161	55.2917	57.6	-2.30831	-4.00749
SH foot association 35
SH foot association 56	Ta12	33.9	1.5302	48.946	73.6702	90.7	-17.0298	-18.7759
SH foot association 77
SH foot association 88	Ta12	28.2	1.45025	43.1391	59.8567	65.7	-5.84326	-8.89386
SH foot association 99	Ta12	27.5	1.43933	42.4016	58.2709	62.55	-4.2791	-6.84108
Arago 44	F16	51.2		51.2	78.4172	79.6216	-1.2044	-1.51265
Boxgrove	T1				82.8	82.8	0	0
Sambungmacan 2	T16				61.9	61.9	0	0
	*see "Measurement key"
Mean					66.3	70.2	-3.9	-5.55556
Without Ta12					70.5	71.5	-1	-1.3986
Potential problem with talar estimates (Ta12) in Will & Stock 2015 reference sample: In the hunter-gatherer reference sample used by Will & Stock (2015) only n=25 individuals preserve the measurement Ta12 with a mean pf 28.3 mm and a range of 22.9-32.0 mm, which is below some of the measurements in the SH collection. The reference sample might thus be too small and the Ta12 generally to short for…

## Sheet: Stature Mid-Plei Homo
Specimen	Element*	Measurement (mm)	log10	Prediction (Will & Stock)	Stature (in study)	diff (cm)	diff (%)
Broken Hill E689 (Femur)
Broken Hill E691 (Tibia)	T1	395	2.5966	170.035	184.2	-14.1652	-7.69011
Broken Hill E907 (Femur)
ThI94-UA28-7
AT-489	Ca1	75	1.87506	160.473	166.25	-5.77671	-3.47471
AT-575	Ta6	53.4	1.72754	158.57	166.95	-8.38045	-5.01973
AT-800 (coxal)
AT-835+AT-2501 (coxal)
AT-859
AT-860	Ta6	51.5	1.71181	155.836	161	-5.16412	-3.20753
AT-1004 (coxal)
AT-1480
AT-1700	Ta6	58.7	1.76864	165.938	170.9	-4.96183	-2.90335
AT-1832
AT-1930	Ta6	53.3	1.72673	158.427	162.8	-4.37305	-2.68615
AT-2350 (coxal)
AT-2466	Ca1	72.5	1.86034	158.028	160	-1.97234	-1.23271
AT-2803	Ta6	59.4	1.77379	166.885	174	-7.11493	-4.08904
AT-3130	Ca1	73.6	1.86688	159.109	165.1	-5.99067	-3.62851
AT-3131	Ca1	73.5	1.86629	159.011	165.05	-6.03864	-3.65867
AT-3132	Ta6	54.8	1.73878	160.552	164.3	-3.74839	-2.28143
AT-3133	Ta6	53.1	1.72509	158.141	166.3	-8.15868	-4.906
AT-4425	Ta6	54.1	1.7332	159.564	163.6	-4.03608	-2.46704
SH Pelvis 110
SH Coxal 1 (Coxal)
SH Femur IV/V
SH Femur X	F1	458	2.66087	166.941	170	-3.05917	-1.79951
SH Femur XI
SH Femur XII/XIII	F1	450	2.65321	165.04	167.8	-2.76041	-1.64506
SH Femur XVI
SH Tibia I	T1	336	2.52634	154.156	157.9	-3.74358	-2.37086
SH Tibia III / AT-848 (Tibia)	T1	378	2.57749	165.562	171.7	-6.13824	-3.57498
SH Tibia IV	T1	325	2.51188	151.078	154.3	-3.22197	-2.08812
SH Tibia VI	T1	356	2.55145	159.654	164.5	-4.84641	-2.94614
SH Tibia XI	T1	351	2.54531	158.291	162.8	-4.50904	-2.76968
SH Tibia XII	T1	368	2.56585	162.894	168.4	-5.50649	-3.26989
SH Fibula I	Fib1	351	2.54531	-	162.3			No formula
SH Fibula II	Fib1	327	2.51455	-	153.7			No formula
SH Fibula III	Fib1	357	2.55267	-	164.5			No formula
SH foot association 1	Ta6 / Ca 1	58.5 / 79.9	1.7671 / 1.90255	165.4	173.675	-8.275	-4.76465
SH foot association 2	Ta6 / Ca 1	52.7 / 72.2	1.7218 / 1.8585	157.6	161.3	-3.7	-2.29386
SH foot association 3	Ca1	82.5	1.91645	167.554	175.55	-7.99645	-4.55508
SH foot association 5	Ta6	61.9	1.79169	170.22	175.274	-5.05371	-2.88332
SH foot association 7	Ca1	85.6	1.93247	170.377	177.8	-7.42314	-4.17499
SH foot association 8	Ca 1	82.5	1.9164	167.5	173.65	-6.15	-3.54161
SH foot association 9	Ta6 / Ca 1	47.9 / 74.8	1.6803 / 1.8739	155.4	159.8	-4.4	-2.75344
Arago 44
Boxgrove	T1	373	2.57171	164.231	175.3	-11.0688	-6.31423
Sambungmacan 2	T16			165.1	165.1	0	0
	Multiple values were averaged
	*see "Measurement key"
Mean				161.9	166.8	-4.9	-2.93765

## Sheet: Test Austral.
Overview of regression comparisons for Australopithecines (Summary of results in Supplementary Information; details in sheets Body mass/Stature Austral.)
Specimen	BM (in study)	BM (Will & Stock 2015)1	diff (kg)	diff (%)	Element (in test)*	Stature (in study)	Stature (Will & Stock 2015)	diff (cm)	diff (%)	Element (in test)*	Taxonomic group broad	Taxonomic group narrow
OH 80-12	46.4	46.4	0	0	Lower limb (Long bone)						Paranthropines	P. boisei
KNM-ER 1463	47.6	47.6	0	0	Lower limb (Long bone)	116	129.534	13.5344	11.6676	F1	Paranthropines	P. boisei?
KNM-ER 1465	43.413	43.4	0	0	Multivariate						Paranthropines	P. boisei?
KNM-ER 993	33.5159	41.7772	8.2613	24.6489	F27	137	144.042	7.0424	5.14044	F1	Paranthropines	P. boisei?
KNM-ER 815	40.8647	40.9	0	0	Multivariate						Paranthropines	P. boisei?
OH 20	51.5831	51.6	0	0	Multivariate						Paranthropines	P. boisei?
SK 3121	23.9914	24.1354	0.143975	0.600112	F16						Paranthropines	P. robustus
SK 3155B	29.1	32.6436	3.5436	12.1773	F16	110	125.425	15.4251	14.0228	F1 (Oc8)	Paranthropines	P. robustus
SK 14024	27.6	30.1807	2.5807	9.35036	F16						Paranthropines	P. robustus
SK 50	42.6	55.9021	13.3021	31.2256	F16						Paranthropines	P. robustus
SK 82	30.8269	37.3455	6.51856	21.1457	F16	126	136.76	10.7601	8.53977	F1 (F16)	Paranthropines	P. robustus
SK 97	35.3119	42.7191	7.40721	20.9765	F16	137	144.555	7.55494	5.51456	F1 (F16)	Paranthropines	P. robustus
SKW 19	26	27.7178	1.7178	6.60692	F16						Paranthropines	P. robustus
SWT1/LB-2	30.9058	37.1216	6.21583	20.1122	F16						Paranthropines	P. robustus
KNM-ER 1476a	34.6514	50.2954	15.644	45.1468	T17	161.3	147.304	-13.9957	-8.67681	Ta6	Paranthropines	P. boisei?
KNM-ER 738	29.422	33.987	4.56496	15.5155	F16	125	136.232	11.232	8.9856	F1 (F16)	Paranthropines	P. boisei?
KNM-ER 1500d	28.4394	28.4	0	0	Multivariate	116	129.534	13.5344	11.6676	F1	Paranthropines	P. boisei?
KNM-ER 1503	30.5419	37.3455	6.80364	22.2764	F16	131	139.906	8.90606	6.79852	F1 (F16)	Paranthropines	P. boisei?
KNM-ER 1505	32.4	37.7933	5.3933	16.646	F16						Paranthropines	P. boisei?
MH1	29.652	33.987	4.335	14.6196	F16						Australopithecines	Au. sediba (juv)
MH2	29.1201	33.3153	4.19521	14.4066	F16						Australopithecines	Au. sediba
MH4	22.7405	22.7	-0.040492	0	-						Australopithecines	Au. sediba
Stw 598	28.8	32.1958	3.3958	11.791	F16						Australopithecines	Au. africanus
Sts 14	22.768	25.9266	3.15856	13.8728	F16	110	125.425	15.4251	14.0228	F1 (Oc8)	Australopithecines	Au. africanus
Sts 34	38.6	38.6	0	0	Disttib						Australopithecines	Au. africanus
Stw 102	31.4	31.4	0	0	Ta12						Australopithecines	Au. africanus
StW 121	43.3278	55.0091	11.6813	26.9602	FemArea (MS)						Australopithecines	Au. africanus
Stw 25	29.1	32.6436	3.5436	12.1773	F16	120	132.235	12.2353	10.1961	F1 (F16)	Australopithecines	Au. africanus
Stw 300	30.2	34.4348	4.2348	14.0225	F16						Australopithecines	Au. africanus
Stw 31	26.3	28.1656	1.8656	7.09354	F16						Australopithecines	Au. africanus
Stw 311	33.9	40.0323	6.1323	18.0894	F16						Australopithecines	Au. africanus
Stw 358	23.7	23.7	0	0	Disttib						Australopithecines	Au. africanus
Stw 361	24.6	25.2549	0.6549	2.6622	F16						Australopithecines	Au. africanus
Stw 392	28.4662	30.6285	2.16233	7.59613	F16	116	129.806	13.8058	11.9016	F1 (F16)	Australopithecines	Au. africanus
Stw 403	27.3	29.7329	2.4329	8.91172	F16						Australopithecines	Au. africanus
Stw 431	34.5	40.9279	6.4279	18.6316	F16						Australopithecines	Au. africanus
Stw 443	34.3	40.704	6.404	18.6706	F16	134	142.499	8.49886	6.34243	F1 (Oc8)	Australopithecines	Au. africanus
Stw 479	27.1	29.509	2.409	8.8893	F16						Australopithecines	Au. africanus
Stw 501	29.9	33.987	4.087	13.6689	F16						Australopithecines	Au. africanus
Stw 522	26.2647	28.3895	2.12477	8.08984	F16						Australopithecines	Au. africanus
Stw 527	29.9	33.987	4.087	13.6689	F16						Australopithecines	Au. africanus
TM 1513	32.9	33.443	0.543003	1.65046	F27						Australopithecines	Au. africanus
Stw 99	36.3449	45.182	8.83706	24.3144	F16	142	147.863	5.86294	4.12883	F1 (F16)	Australopithecines	Au. Africanus
BOU-VP-12/1	36	36.1678	0.167803	0.466119	F1						Australopithecines	Au. garhi
EP1000/98	31.7079	31.2112	-0.496616	-1.56622	T17						Paranthropines	P. aethiopicus?
MLD 17	36.8	44.2864	7.4864	20.3435	F16						Australopithecines	Au. africanus
MLD 25	33.9	40.0323	6.1323	18.0894	F16						Australopithecines	Au. africanus
MLD 46	35.1706	43.1669	7.99628	22.7357	F16						Australopithecines	Au. africanus
AL 827-1	38.1834	45.182	6.99861	18.3289	F16						Australopithecines	Au. afarensis
AL 288-1	25.9721	23.9115	-2.0606	-7.93389	F16	105	121.242	16.2419	15.4685	F1	Australopithecines	Au. afarensis
AL 330-6	40.654	56.5653	15.9112	39.1381	T17						Australopithecines	Au. afarensis
AL 333-131	63.5766	61.917	-1.65957	-2.61035	FemArea (MS)						Australopithecines	Au. afarensis
AL 333-142	35.16	35.2	0	0	Multivariate						Australopithecines	Au. afarensis
AL 333-3	38.5439	52.0315	13.4876	34.993	F16	151	153.868	2.86785	1.89924	F1 (F16)	Australopithecines	Au. afarensis
AL 333-4	41.5	57.1713	15.6713	37.7622	F27						Australopithecines	Au. afarensis
AL 333-6	33.7	35.4109	1.71087	5.07677	T25						Australopithecines	Au. afarensis
AL 333-7	42.7	42.1135	-0.586513	-1.37357	T25						Australopithecines	Au. afarensis
AL 333-95	49.7085	49.7	0	0	Multivariate						Australopithecines	Au. afarensis
AL 333w-40	55.1566	55.2	0	0	Multivariate						Australopithecines	Au. afarensis
AL 333w-43	24.4827	29.0975	4.61486	18.8495	T25						Australopithecines	Au. afarensis
AL 333x-26	39.5354	56.7262	17.1908	43.4821	T17						Australopithecines	Au. afarensis
AL 128-1	39.1	39.1	0	0	Lower limb (Long bone)						Australopithecines	Au. afarensis
AL 129-1	28.5	33.443	4.943	17.3439	F27						Australopithecines	Au. afarensis
AL 211-1	52.7817	52.8	0	0	Multivariate						Australopithecines	Au. afarensis
AL 152-2	28.5959	34.2109	5.615	19.6357	F16						Australopithecines	Au. afarensis
KSD-VP-1/1	40.9	53.5367	12.6367	30.8967	F16						Australopithecines	Au. afarensis
KNM-KP 29285	46.3083	59.9811	13.6729	29.5258	T17						Australopithecines	Au. anamensis
					*see "Measurement key"					*see "Measurement key"
Mean	34.7	39.1	4.4	12.6801		127.3	136.6	9.3	7.30558
CV	24.5	25.8	1.3			12.3673	6.95539	-5
1Due to their unreliability (see sheet "Body mass Austral.") FemArea(ST) estimates were excluded and original estimates used in the test reported in Supplementary Text 3b and Supplementary Table 3. To check whether this procedure incorporated any bias in the final results, statistical tests including the likely flawed FemArea(ST) estimates were carried out and also found significant body mass and…

## Sheet: Body mass Austral.
Specimen	Element*	Measurement (mm)	log10	Prediction FHD (Will & Stock)	Prediction BM (Will & Stock)	BM (in study)	diff (kg)	diff (%)
OH 80-12	FemArea (ST)	701.5	2.84603	42.6985	58.9094	46.4	12.5094	26.9598
KNM-ER 1463	FemArea (ST)	584.25	2.7666	39.7808	52.6354	47.6	5.03535	10.5785
KNM-ER 1465	FemArea (ST)	757.18	2.8792	43.9795	61.6639	43.413	18.2509	42.0401
KNM-ER 993	F27	62.9	1.79865	36.4793	41.7772	33.5159	8.2613	24.6489
KNM-ER 815	FemArea (ST)	545.4	2.73672	38.7355	50.3875	40.8647	9.52284	23.3034
OH 20	FemArea (ST)	858	2.93349	46.1593	66.3513	51.5831	14.7682	28.6299
SK 3121	F16	28.6		28.6	24.1354	23.9914	0.143975	0.600112
SK 3155B	F16	32.4		32.4	32.6436	29.1	3.5436	12.1773
SK 14024	F16	31.3		31.3	30.1807	27.6	2.5807	9.35036
SK 50	F16	41.3		41.3	55.9021	42.6	13.3021	31.2256
SK 82	F16	34.5		34.5	37.3455	30.8269	6.51856	21.1457
SK 97	F16	36.9		36.9	42.7191	35.3119	7.40721	20.9765
SKW 19	F16	30.2		30.2	27.7178	26	1.7178	6.60692
SWT1/LB-2	F16	34.4		34.4	37.1216	30.9058	6.21583	20.1122
KNM-ER 1476a	T17	58.1	1.76418	38.6926	50.2954	34.6514	15.644	45.1468
KNM-ER 738	F16	33		33	33.987	29.422	4.56496	15.5155
KNM-ER 1500d	FemArea (ST)	589.12	2.7702	39.9088	52.9106	28.4394	24.4712	86.0466
KNM-ER 1503	F16	34.5		34.5	37.3455	30.5419	6.80364	22.2764
KNM-ER 1505	F16	34.7		34.7	37.7933	32.4	5.3933	16.646
MH1	F16	33		33	33.987	29.652	4.335	14.6196
MH2	F16	32.7		32.7	33.3153	29.1201	4.19521	14.4066
MH4	-	-	-	-	22.7	22.7405	-0.040492	0
Stw 598	F16	32.2		32.2	32.1958	28.8	3.3958	11.791
Sts 14	F16	29.4		29.4	25.9266	22.768	3.15856	13.8728
Sts 34	Disttib	-			38.6	38.6	0	0	No regression euquation available.
Stw 102	Ta12	18.6	1.26951		31.4	31.4	0	0
StW 121	FemArea (MS)	573.3	2.75838	40.8847	55.0091	43.3278	11.6813	26.9602
Stw 25	F16	32.4		32.4	32.6436	29.1	3.5436	12.1773
Stw 300	F16	33.2		33.2	34.4348	30.2	4.2348	14.0225
Stw 31	F16	30.4		30.4	28.1656	26.3	1.8656	7.09354
Stw 311	F16	35.7		35.7	40.0323	33.9	6.1323	18.0894
Stw 358	Disttib	-			23.7	23.7	0	0	No regression euquation available.
Stw 361	F16	29.1		29.1	25.2549	24.6	0.6549	2.6622
Stw 392	F16	31.5		31.5	30.6285	28.4662	2.16233	7.59613
Stw 403	F16	31.1		31.1	29.7329	27.3	2.4329	8.91172
Stw 431	F16	36.1		36.1	40.9279	34.5	6.4279	18.6316
Stw 443	F16	36		36	40.704	34.3	6.404	18.6706
Stw 479	F16	31		31	29.509	27.1	2.409	8.8893
Stw 501	F16	33		33	33.987	29.9	4.087	13.6689
Stw 522	F16	30.5		30.5	28.3895	26.2647	2.12477	8.08984
Stw 527	F16	33		33	33.987	29.9	4.087	13.6689
TM 1513	F27	56.5	1.75205	32.757	33.443	32.9	0.543003	1.65046
Stw 99	F16	38		38	45.182	36.3449	8.83706	24.3144
BOU-VP-12/1	F1	335	2.52504	33.974	36.1678	36	0.167803	0.466119
EP1000/98	T17	41.6	1.61909	31.7603	31.2112	31.7079	-0.496616	-1.56622
MLD 17	F16	37.6		37.6	44.2864	36.8	7.4864	20.3435
MLD 25	F16	35.7		35.7	40.0323	33.9	6.1323	18.0894
MLD 46	F16	37.1		37.1	43.1669	35.1706	7.99628	22.7357
AL 827-1	F16	38		38	45.182	38.1834	6.99861	18.3289
AL 288-1	F16	28.5		28.5	23.9115	25.9721	-2.0606	-7.93389
AL 330-6	T17	65.7	1.81757	41.6084	56.5653	40.654	15.9112	39.1381
AL 333-131	FemArea (MS)	694.3	2.84155	44.0972	61.917	63.5766	-1.65957	-2.61035
AL 333-142	FemArea (ST)	491.4	2.69144	37.2036	43.3989	35.16	8.23892	23.4326
AL 333-3	F16	39.5		39.5	52.0315	38.5439	13.4876	34.993
AL 333-4	F27	72.2	1.85854	41.8902	57.1713	41.5	15.6713	37.7622
AL 333-6	T25	18.7	1.27184	33.6359	35.4109	33.7	1.71087	5.07677
AL 333-7	T25	21	1.32222	36.6295	42.1135	42.7	-0.586513	-1.37357
AL 333-95	FemArea (ST)	846.3	2.92752	45.9147	65.8253	49.7085	16.1168	32.4226
AL 333w-40	FemArea (ST)	950.4	2.97791	48.0231	71.7	55.1566	16.5434	29.9935
AL 333w-43	T25	16.6	1.22011	30.8162	29.0975	24.4827	4.61486	18.8495
AL 333x-26	T17	65.9	1.81889	41.6832	56.7262	39.5354	17.1908	43.4821
AL 128-1	FemArea (ST)	462.5	2.66511	36.3411	41.4678	39.1	2.36776	6.05564
AL 129-1	F27	56.5	1.75205	32.757	33.443	28.5	4.943	17.3439
AL 211-1	FemArea (ST)	904.4	2.95636	47.1098	68.3952	52.7817	15.6135	29.5812
AL 152-2	F16	33.1		33.1	34.2109	28.5959	5.615	19.6357
KSD-VP-1/1	F16	40.2		40.2	53.5367	40.9	12.6367	30.8967
KNM-KP 29285	T17	70	1.8451	43.1969	59.9811	46.3083	13.6729	29.5258
	*see "Measurement key"
Overall mean					41.2	34.7	6.5	18.732
Mean without FemArea(ST)					39.1	34.7	4.4	12.6801
Mean only FHD					36	34.7	1.3	3.7464
CV					30.3	24.5
CV without FemArea (ST)					25.8	24.5
CV only FHD					22.5	24.5
FemArea (ST) values are not used in the final test as they consistently and strongly overestimate previous body size estimates for Australopithecus. The likely reason is that the trait scales very different for the modern human reference compared to australopithecines. In contrast, removing these estimates and also looking at only general predictions from FHD yield mostly comparable results with …

## Sheet: Stature Austral.
Specimen	Element*	Measurement (mm)	log10	Prediction (Will & Stock)	Stature (in study)	diff (cm)	diff (%)
OH 80-12
KNM-ER 1463	F1	310	2.49136	129.534	116	13.5344	11.6676
KNM-ER 1465
KNM-ER 993	F1	365	2.56229	144.042	137	7.0424	5.14044
KNM-ER 815
OH 20
SK 3121
SK 3155B	F1 (Oc8)	295	2.46982	125.425	110	15.4251	14.0228
SK 14024
SK 50
SK 82	F1 (F16)	337	2.52763	136.76	126	10.7601	8.53977
SK 97	F1 (F16)	367	2.56467	144.555	137	7.55494	5.51456
SKW 19
SWT1/LB-2
KNM-ER 1476a	Ta6	45.8	1.66087	147.304	161.3	-13.9957	-8.67681
KNM-ER 738	F1 (F16)	335	2.52504	136.232	125	11.232	8.9856
KNM-ER 1500d	F1	310	2.49136	129.534	116	13.5344	11.6676
KNM-ER 1503	F1 (F16)	349	2.54283	139.906	131	8.90606	6.79852
KNM-ER 1505
MH1
MH2
MH4
Stw 598
Sts 14	F1 (Oc8)	295	2.46982	125.425	110	15.4251	14.0228
Sts 34
Stw 102
StW 121
Stw 25	F1 (F16)	320	2.50515	132.235	120	12.2353	10.1961
Stw 300
Stw 31
Stw 311
Stw 358
Stw 361
Stw 392	F1 (F16)	311	2.49276	129.806	116	13.8058	11.9016
Stw 403
Stw 431
Stw 443	F1 (Oc8)	359	2.55509	142.499	134	8.49886	6.34243
Stw 479
Stw 501
Stw 522
Stw 527
TM 1513
Stw 99	F1 (F16)	380	2.57978	147.863	142	5.86294	4.12883
BOU-VP-12/1
EP1000/98
MLD 17
MLD 25
MLD 46
AL 827-1
AL 288-1	F1	280	2.44716	121.242	105	16.2419	15.4685
AL 330-6
AL 333-131
AL 333-142
AL 333-3	F1 (F16)	404	2.60638	153.868	151	2.86785	1.89924
AL 333-4
AL 333-6
AL 333-7
AL 333-95
AL 333w-40
AL 333w-43
AL 333x-26
AL 128-1
AL 129-1
AL 211-1
AL 152-2
KSD-VP-1/1
KNM-KP 29285
	*see "Measurement key"
Mean				136.6	127.3	9.3	7.30558
CV				6.95539	12.3673

## Sheet: Measurement key
Key	Description
Oc8	Acetabulum height (S-I diameter acetabulum)
F1	Max. length femur
F2	Bicondylar femur length
F4a	Diameter subtrochanteric (80%) shaft M-L
F4b	Diameter subtrochanteric (80%) shaft A-P
F6	Circumference subtrochanteric shaft
F8a	Diameter midshaft A-P
F8b	Diameter midshaft M-L
F9	Circumference midshaft
F16	Max. diameter of femoral head (FHD)
F19	Diameter of neck midway M-L
F20	Diameter of neck midway A-P
F21a	Neck length (intertrochanteric line to femoral head)
F27	Bicondylar width (epicondylar breadth)
F28	Diameter of distal shaft A-P (measured between - but excluding - the condyles)
F32	Diameter of medial condyle M-L (taken on its posterior aspect)
F37	Max. diameter of distal articular epiphysis M-L
FemArea (MS)	F8a*F8b
FemArea (ST)	F4a*f4b
T1	Max. length tibia
T16	Circumference at midshaft
T17	Proximal epiphyseal breadth (max. M-L distance across the tibial condyles)
T24	Fistal epiphyseal breadth (Distance between the most medial point of the fibular notch and the most medial point of the medial malleolus)
T25	Max. diameter of talar facet of distal tibia A-P
TX1	Diameter at tibial tuberosity A-P
TX2	Diameter of inferior articular surface A-P
TX3	Diameter of proximal tibia A-P
TX4	Diameter of proximal tibia M-L
TX5	Inferior projection of tibial maleolus
Fb3	Diameter of fibula at midshaft A-P
Fb4	Diameter of fibula at midshaft M-L
Ta6	Max. length talus
Ta8	Talar head length
Ta11	Length of trochlear surface (at midpoint of anterior border)
Ta12	Diameter of trochlear surface at midpoint (M-L)
Ta18	Length of posterior calcaneal articular surface
Ta19	Max. width of posterior calcaneal articular surface
